# Supplementary material
Source: publisher figshare collection journal article supplement (https://tandf.figshare.com/articles/dataset/_/3085726)
Supplement: Supplementary file 1 [file 2]

Supporting information

Corrosion-free electrochemical synthesis of polyaniline using Cu counter electrode in acidic medium

Subhendu Bhandari, Dipak Khastgir*

Rubber Technology Centre, Indian Institute of Technology Kharagpur,

Kharagpur - 721302, India

* Corresponding author

Dipak Khastgir

Rubber Technology Centre, Indian Institute of Technology Kharagpur,

Kharagpur-721302, India

E-mail: khasdi@gmail.com

Ph. No.: +91-3222-283192

**Table S1.** Corrosion of Cu electrode in different cycles of electrochemical synthesis.

| Sample  code | Synthesis cycle | Initial weight of Cu electrode | Weight of Cu electrode after the synthesis cycle | Weight loss of Cu electrode |
| --- | --- | --- | --- | --- |
| P1 | 1st | 33.826 g | 33.765 g | 61 mg |
|  | 2nd | 33.765 g | 33.743 g | 22 mg |
|  | 3rd | 33.743 g | 33.737 g | 6 mg |
| P2 | 1st | 33.712 g | 33.657 g | 55 mg |
|  | 2nd | 33.657 g | 33.637 g | 20 mg |
|  | 3rd | 33.637 g | 33.625 g | 12 mg |
| P3 | 1st | 33.597 g | 33.597 g | 0 |
|  | 2nd | 33.597 g | 33.597 g | 0 |
|  | 3rd | 33.597 g | 33.597 g | 0 |


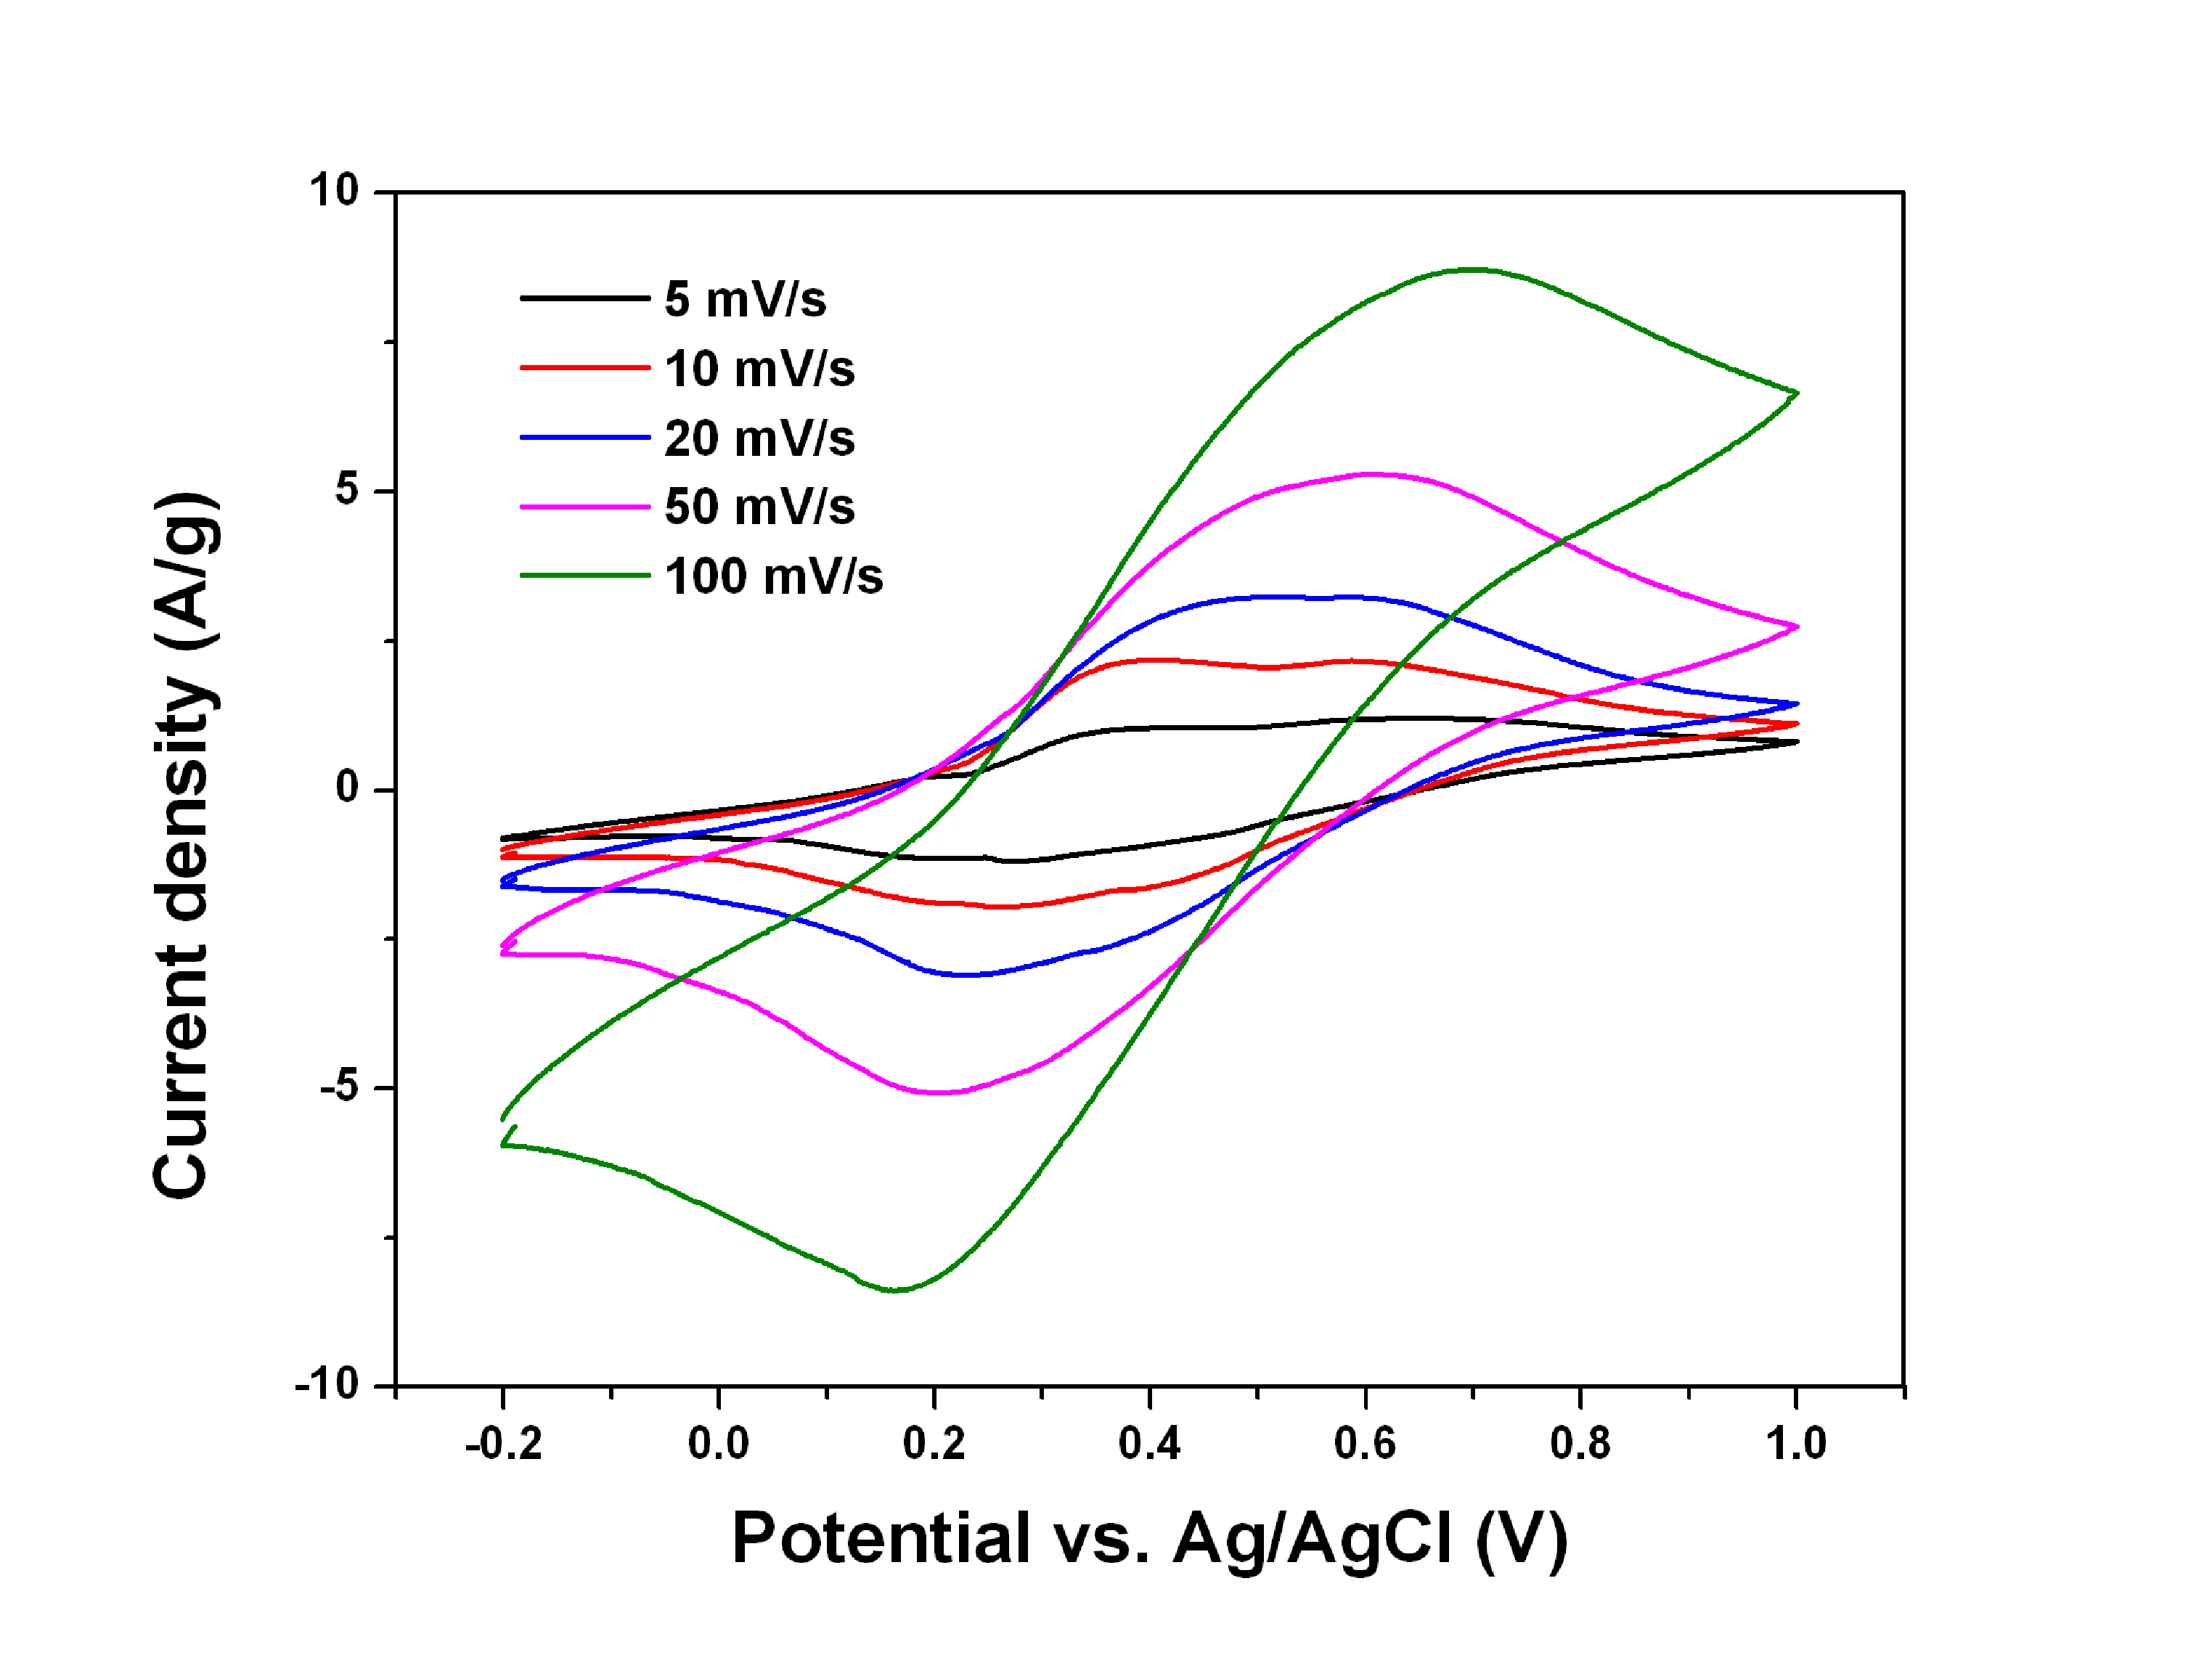


**Figure S1.** Cyclic voltammograms of P1 at different scan rates.


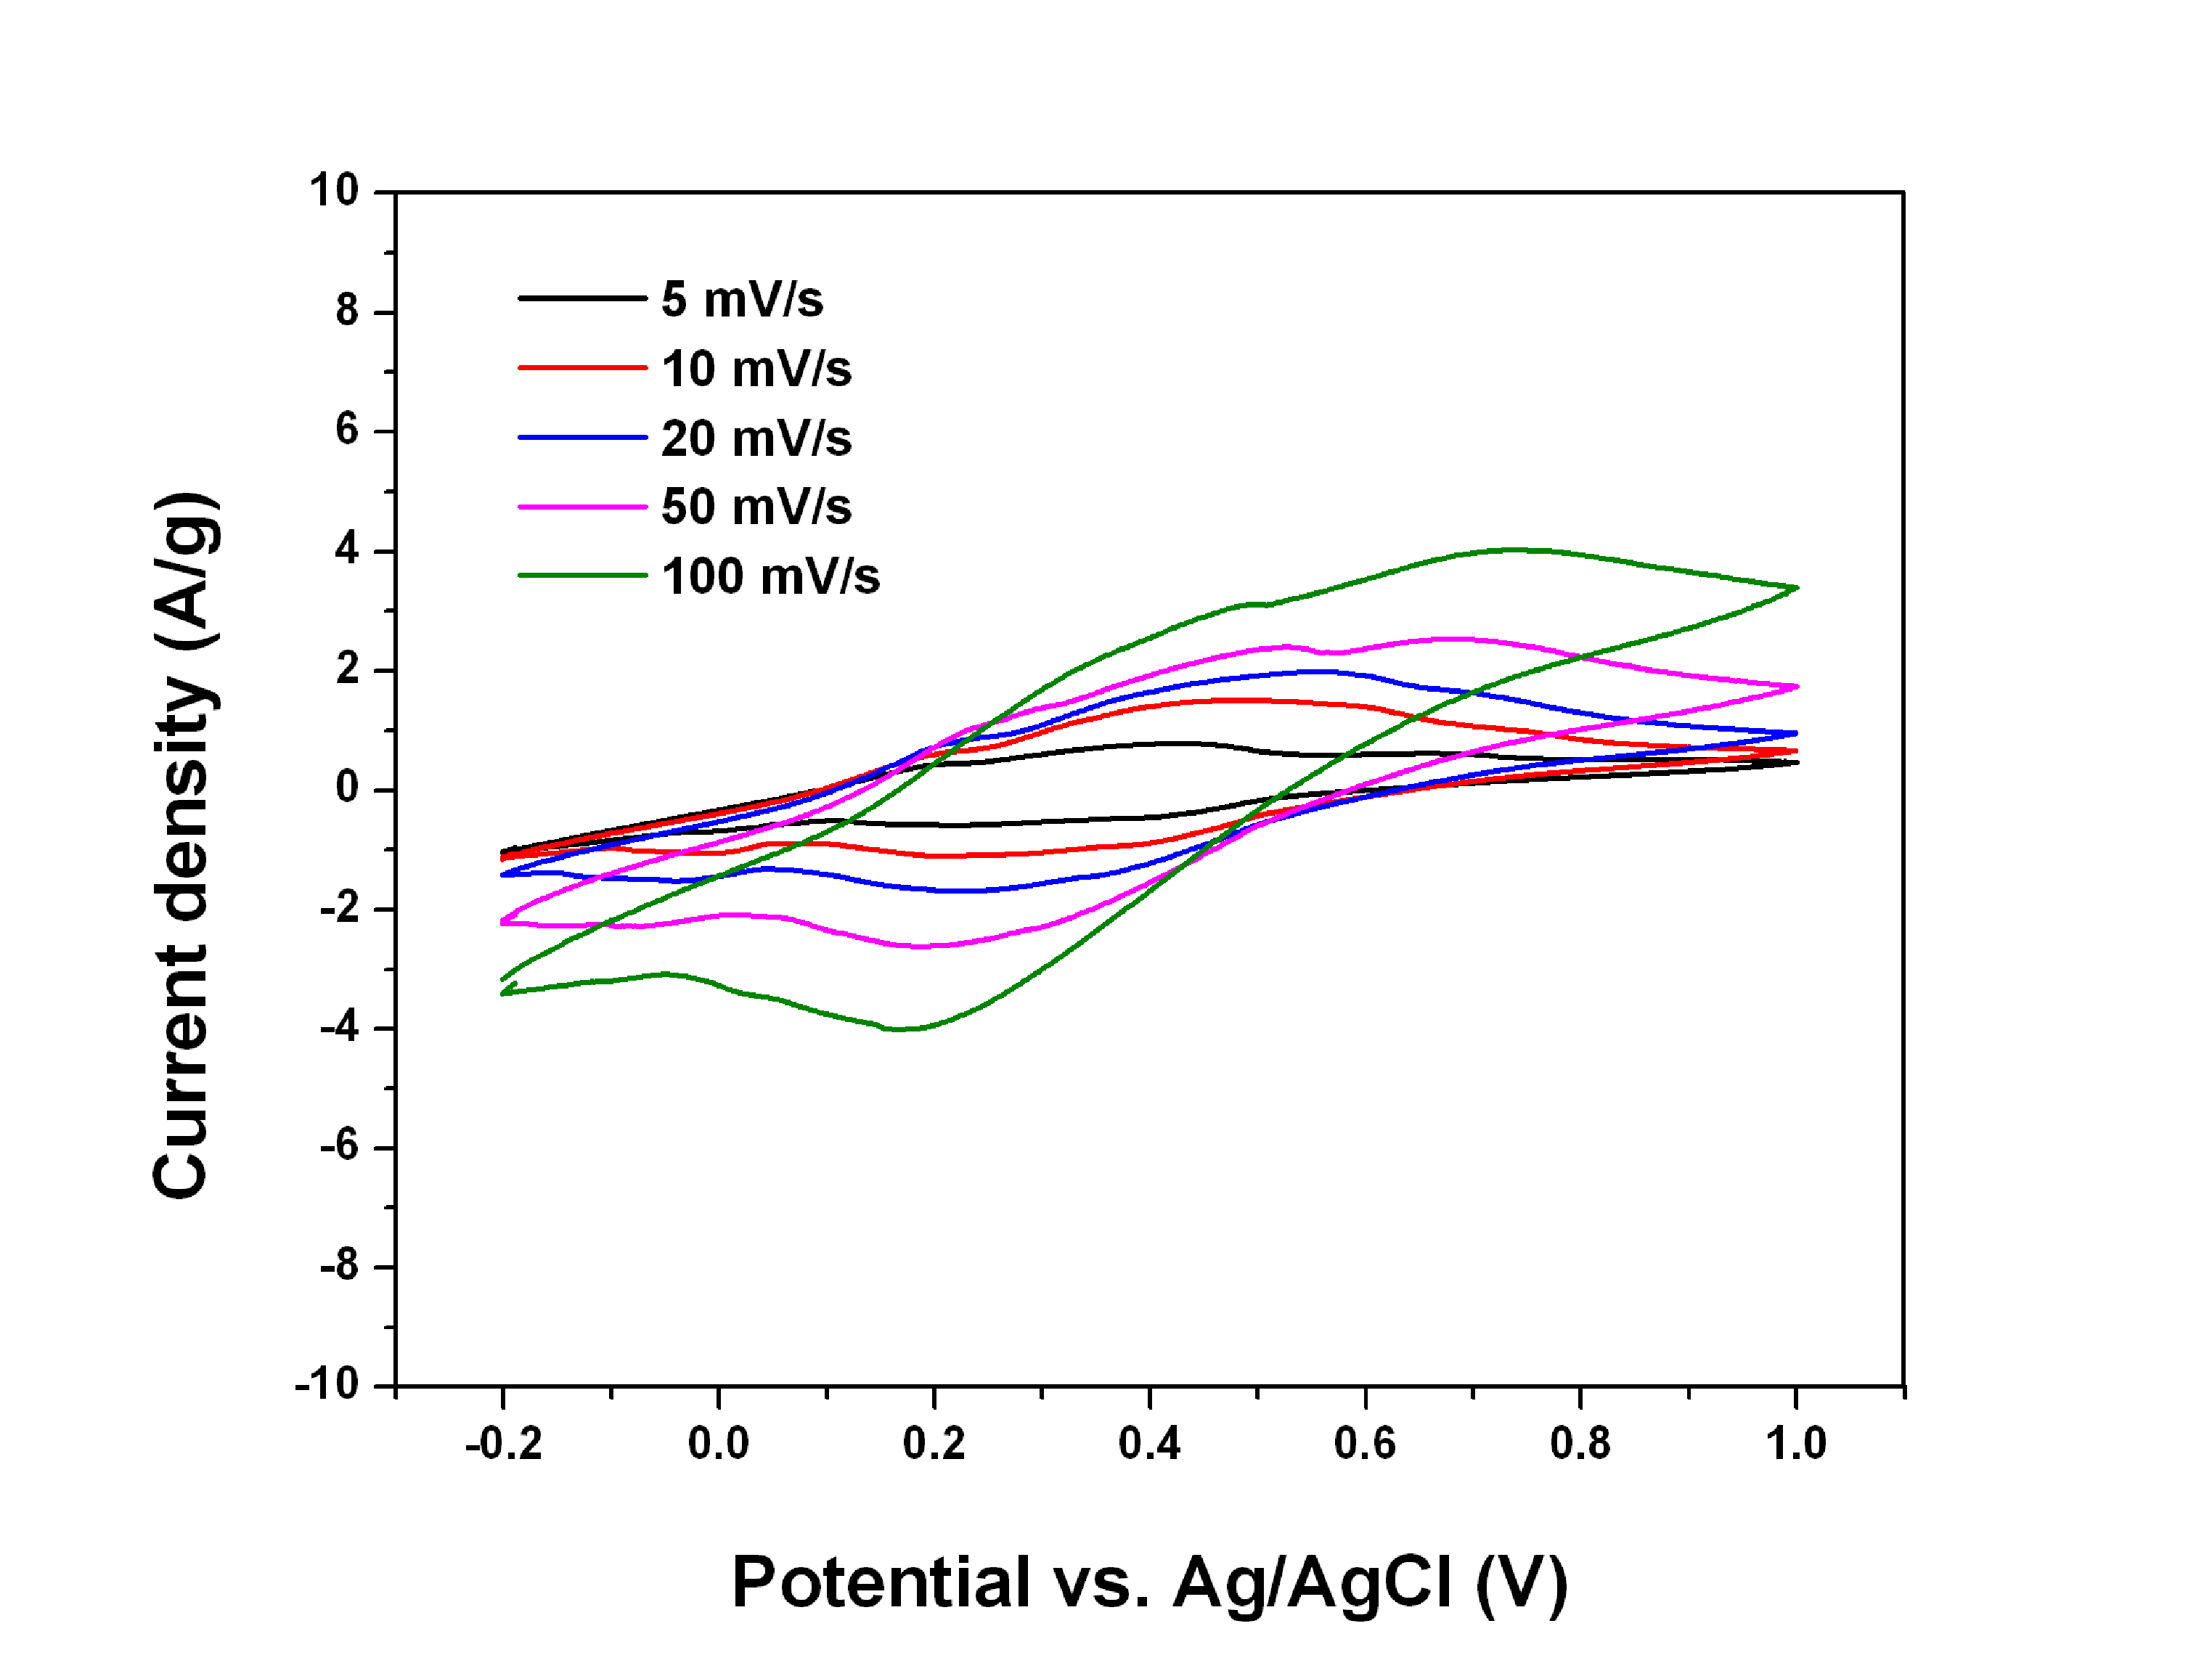


**Figure S2.** Cyclic voltammograms of P2 at different scan rates.


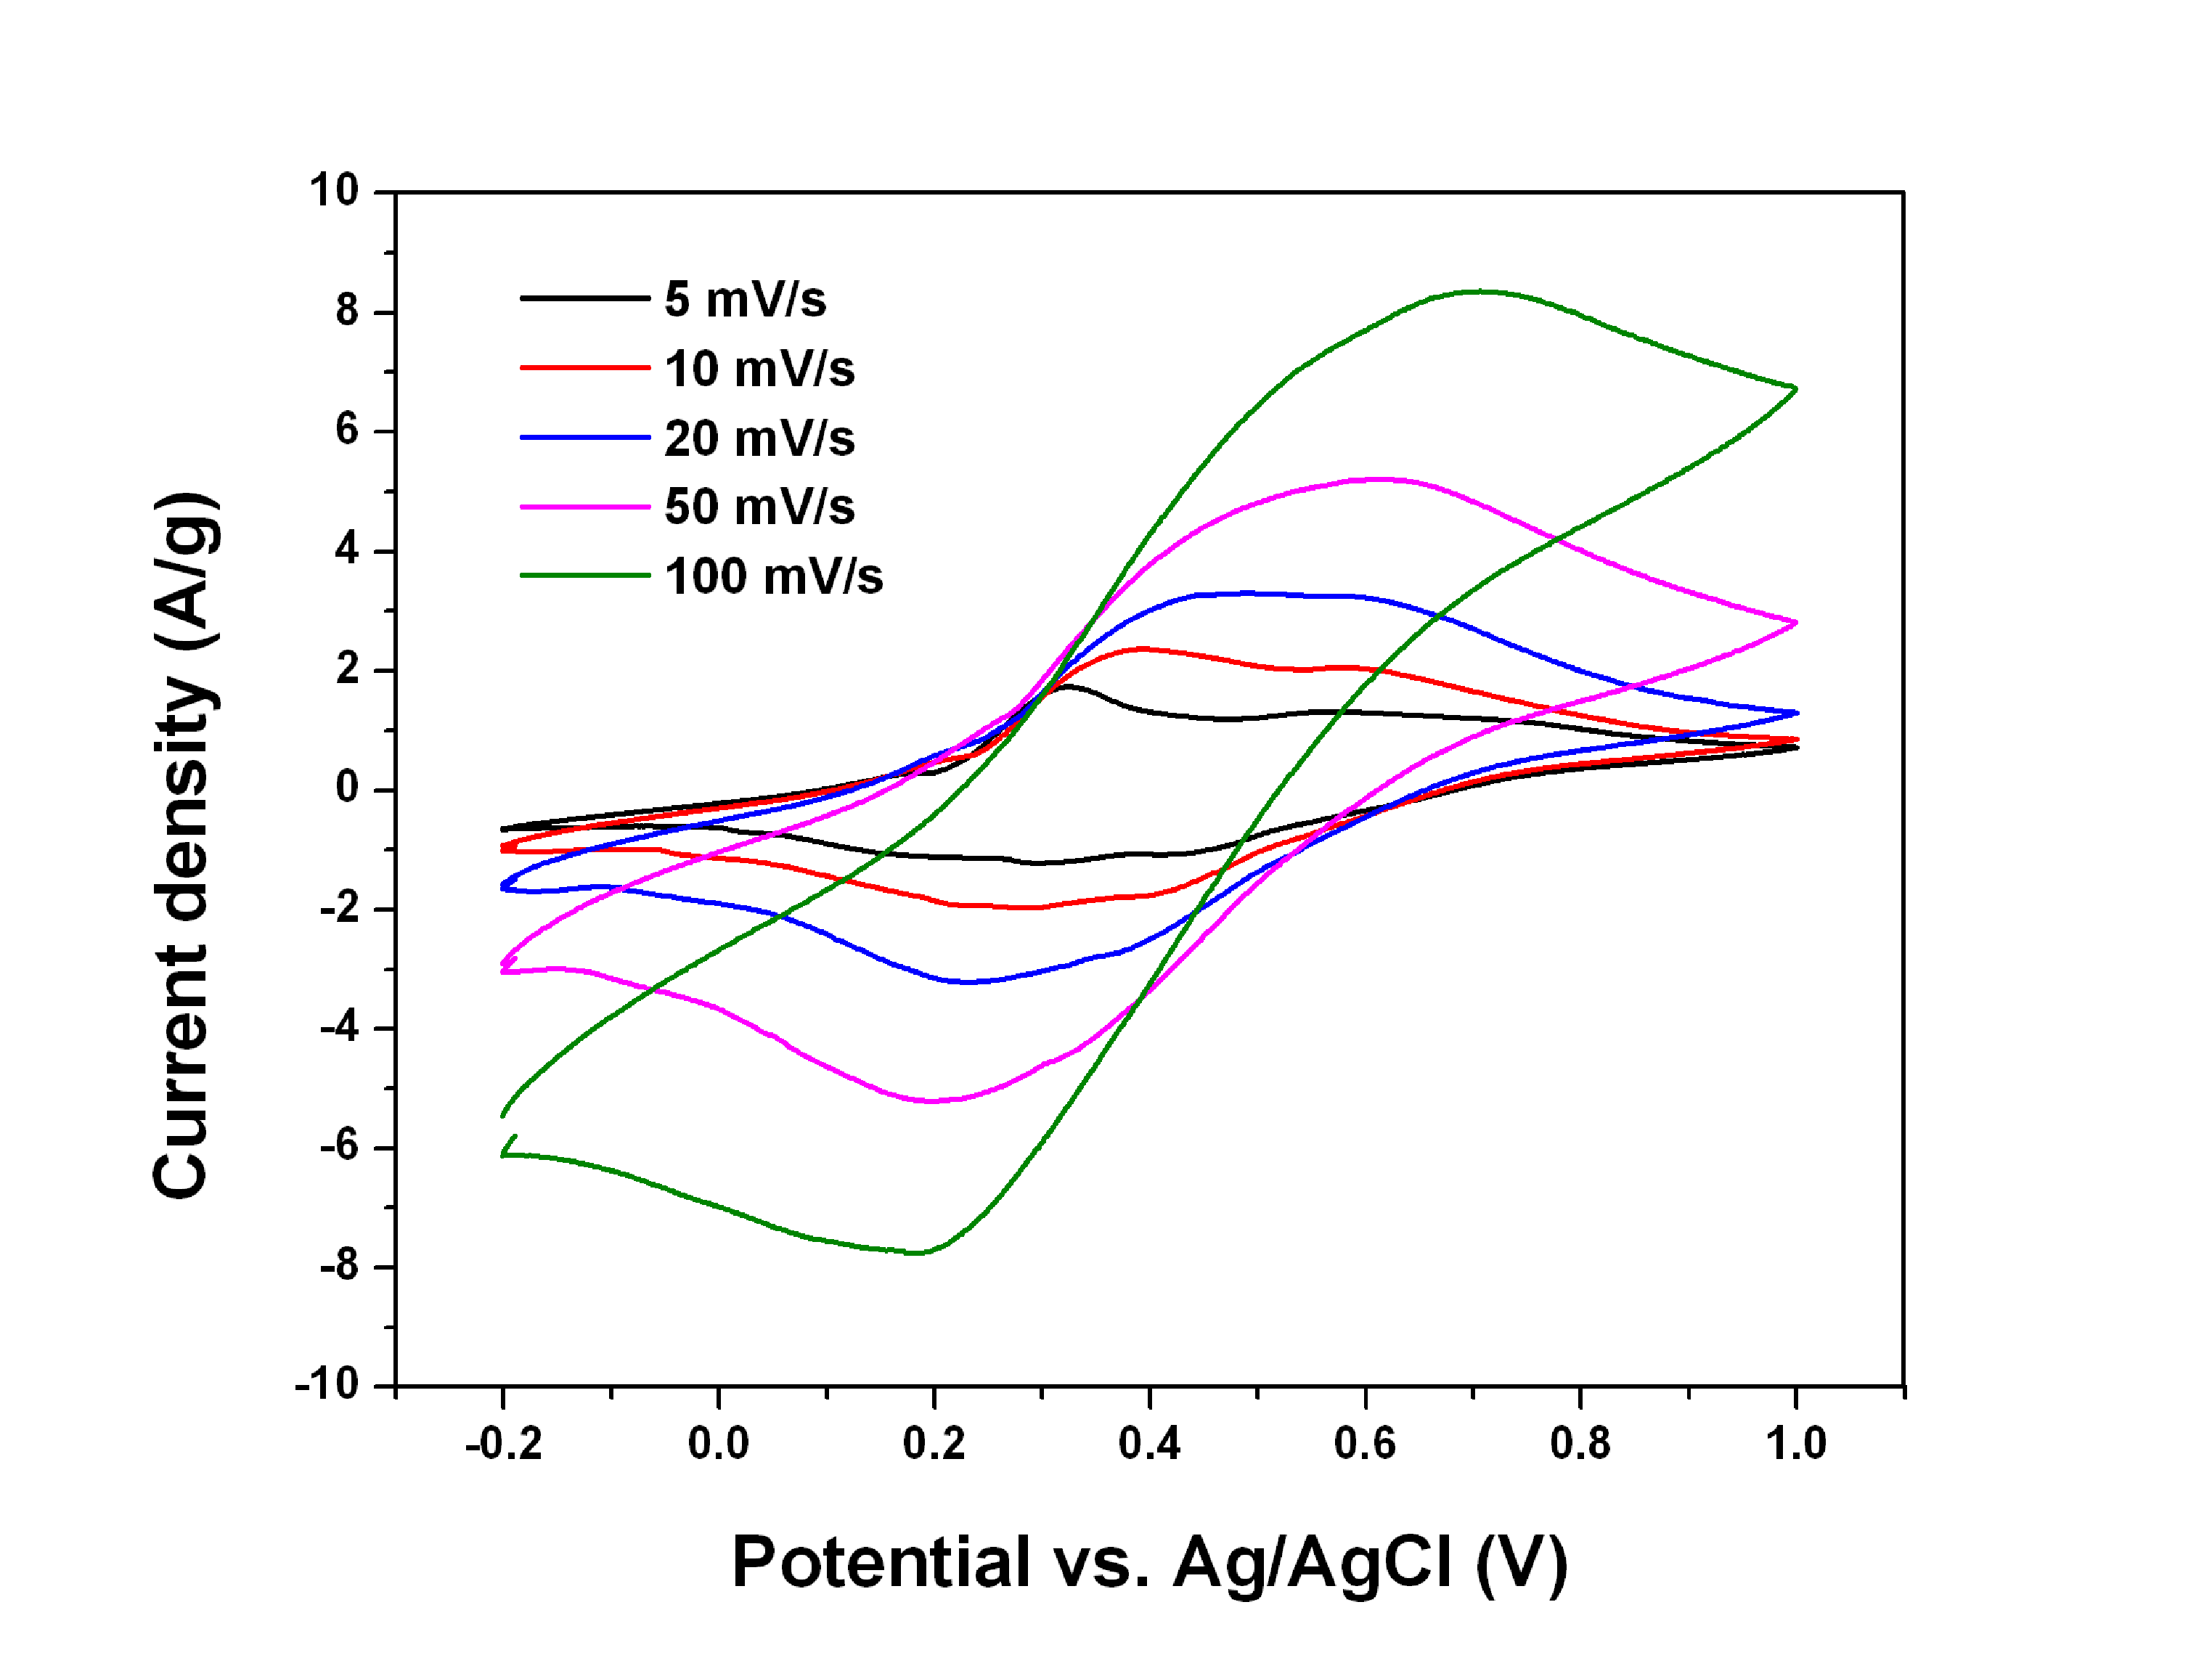


**Figure S3.** Cyclic voltammograms of P3 at different scan rates.


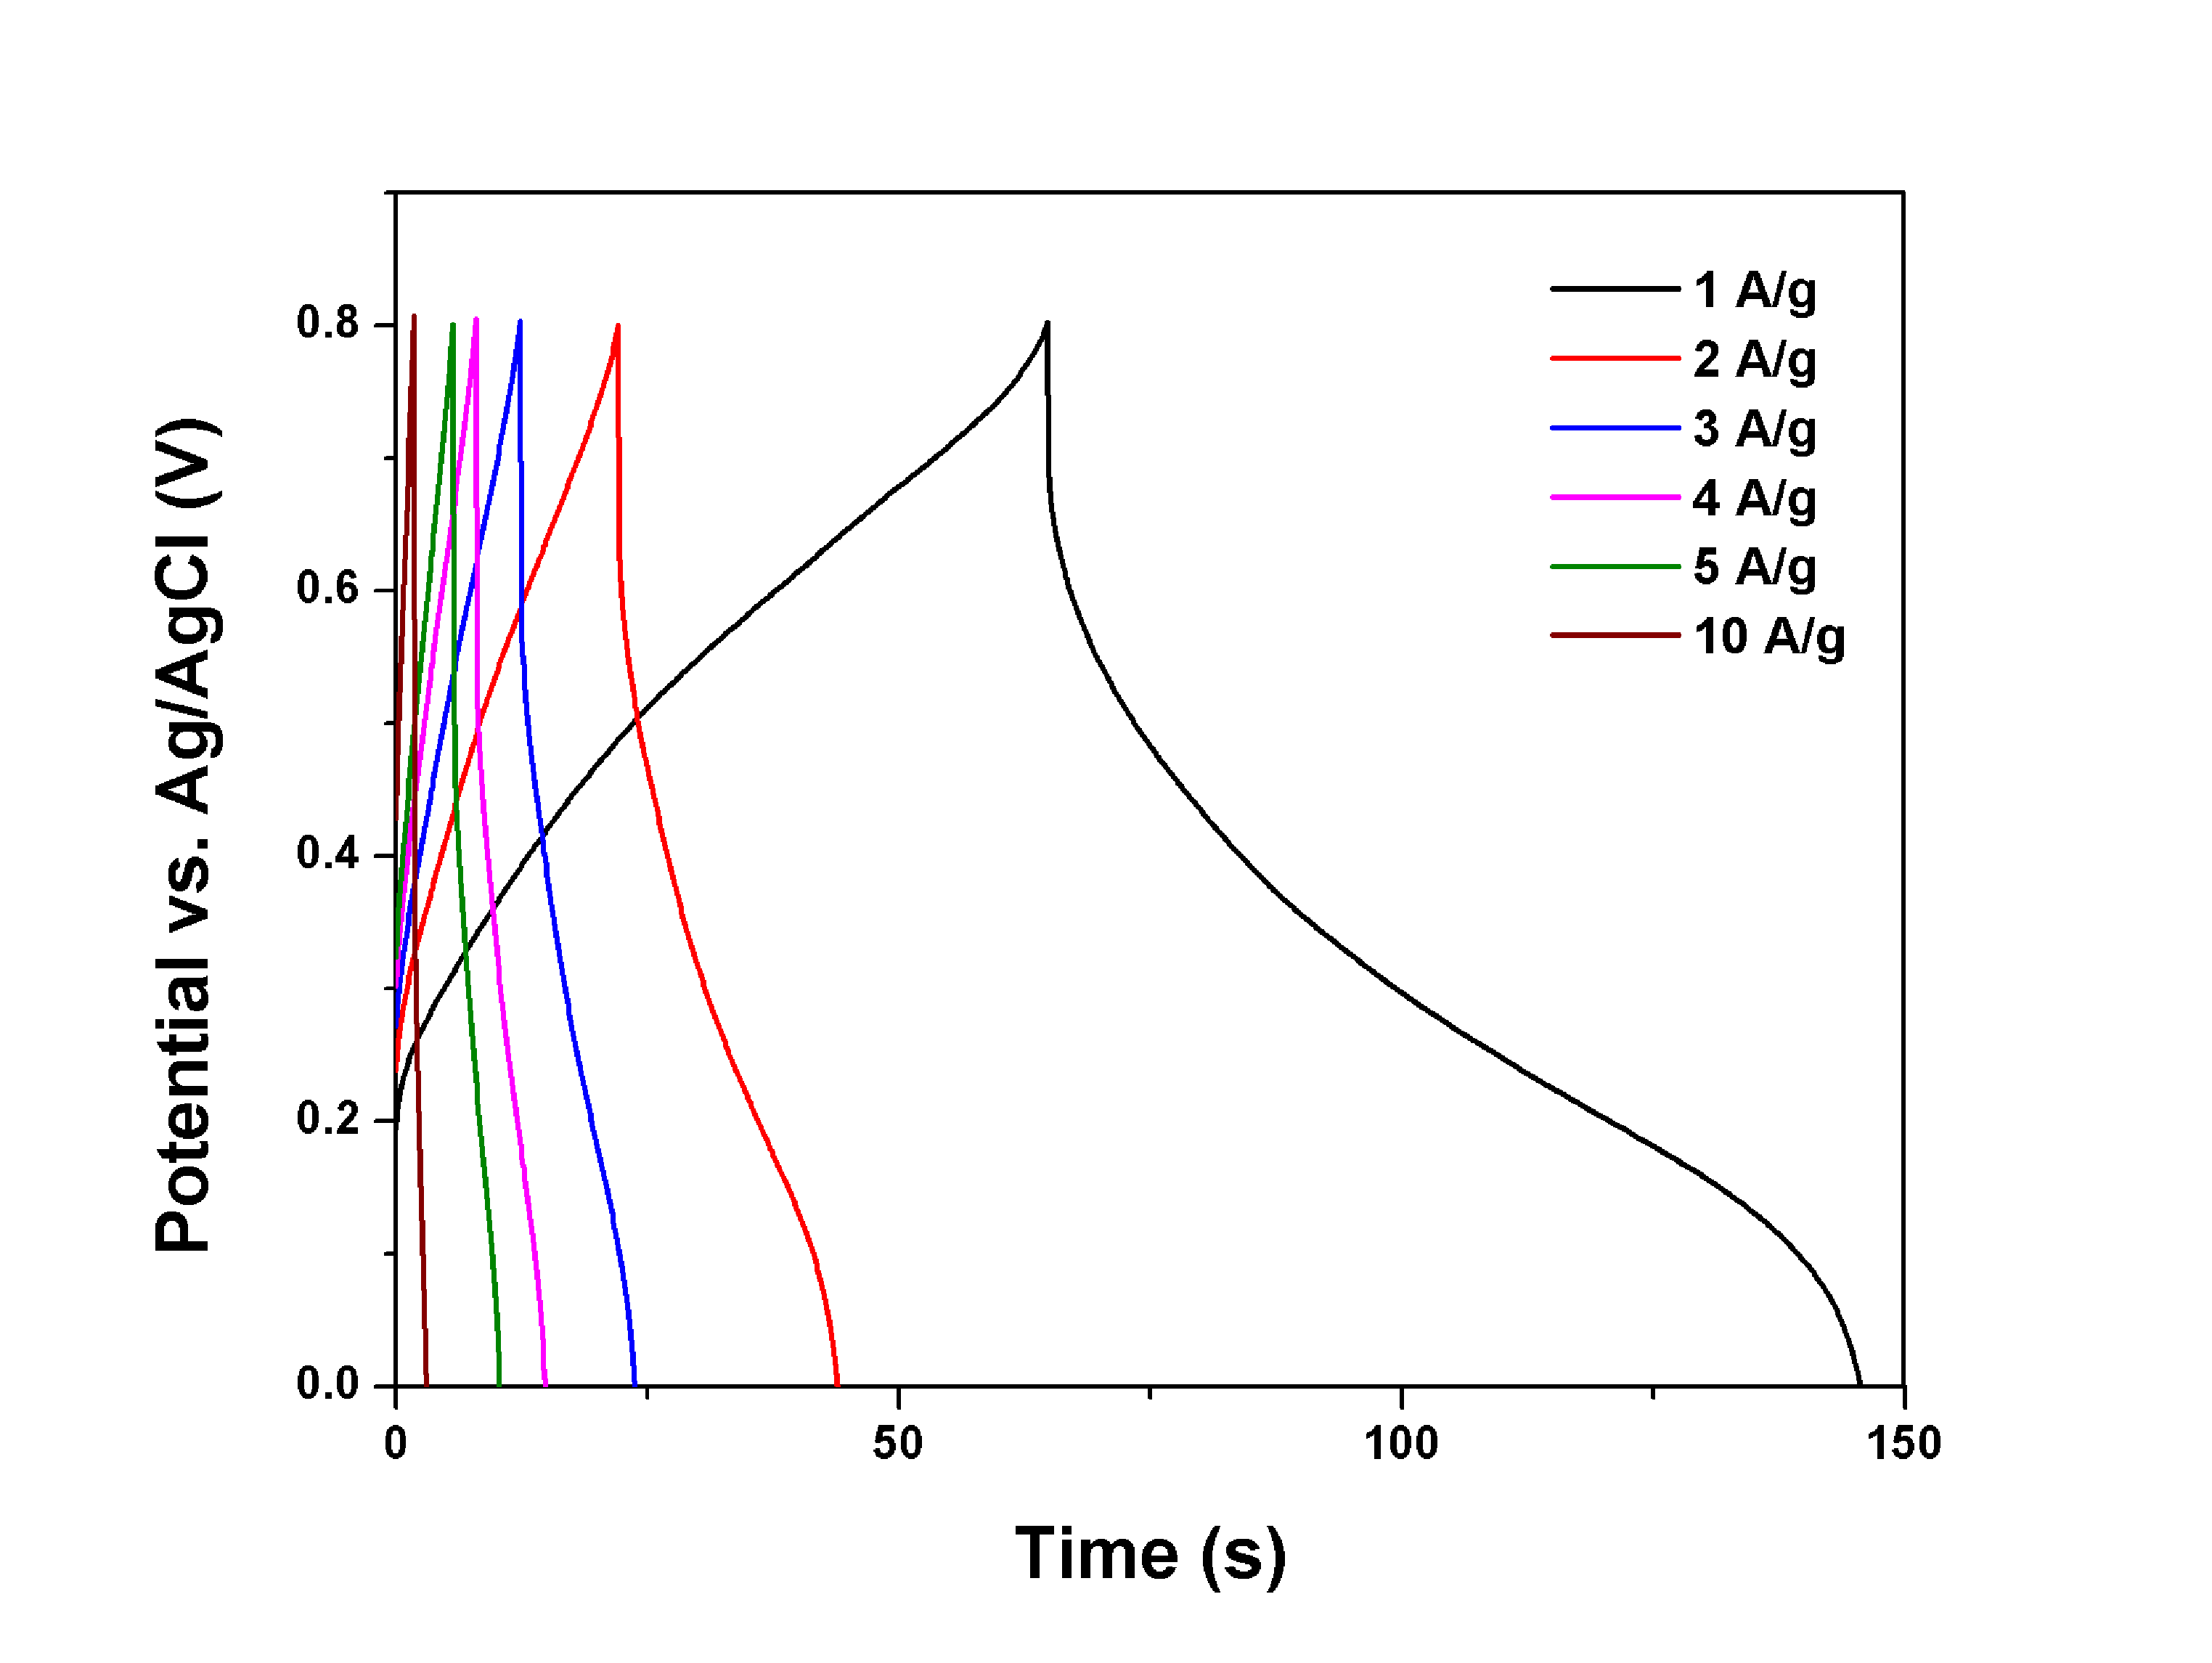


**Figure S4.** Galvanostatic charge-discharge profiles of P1 at different current rates.


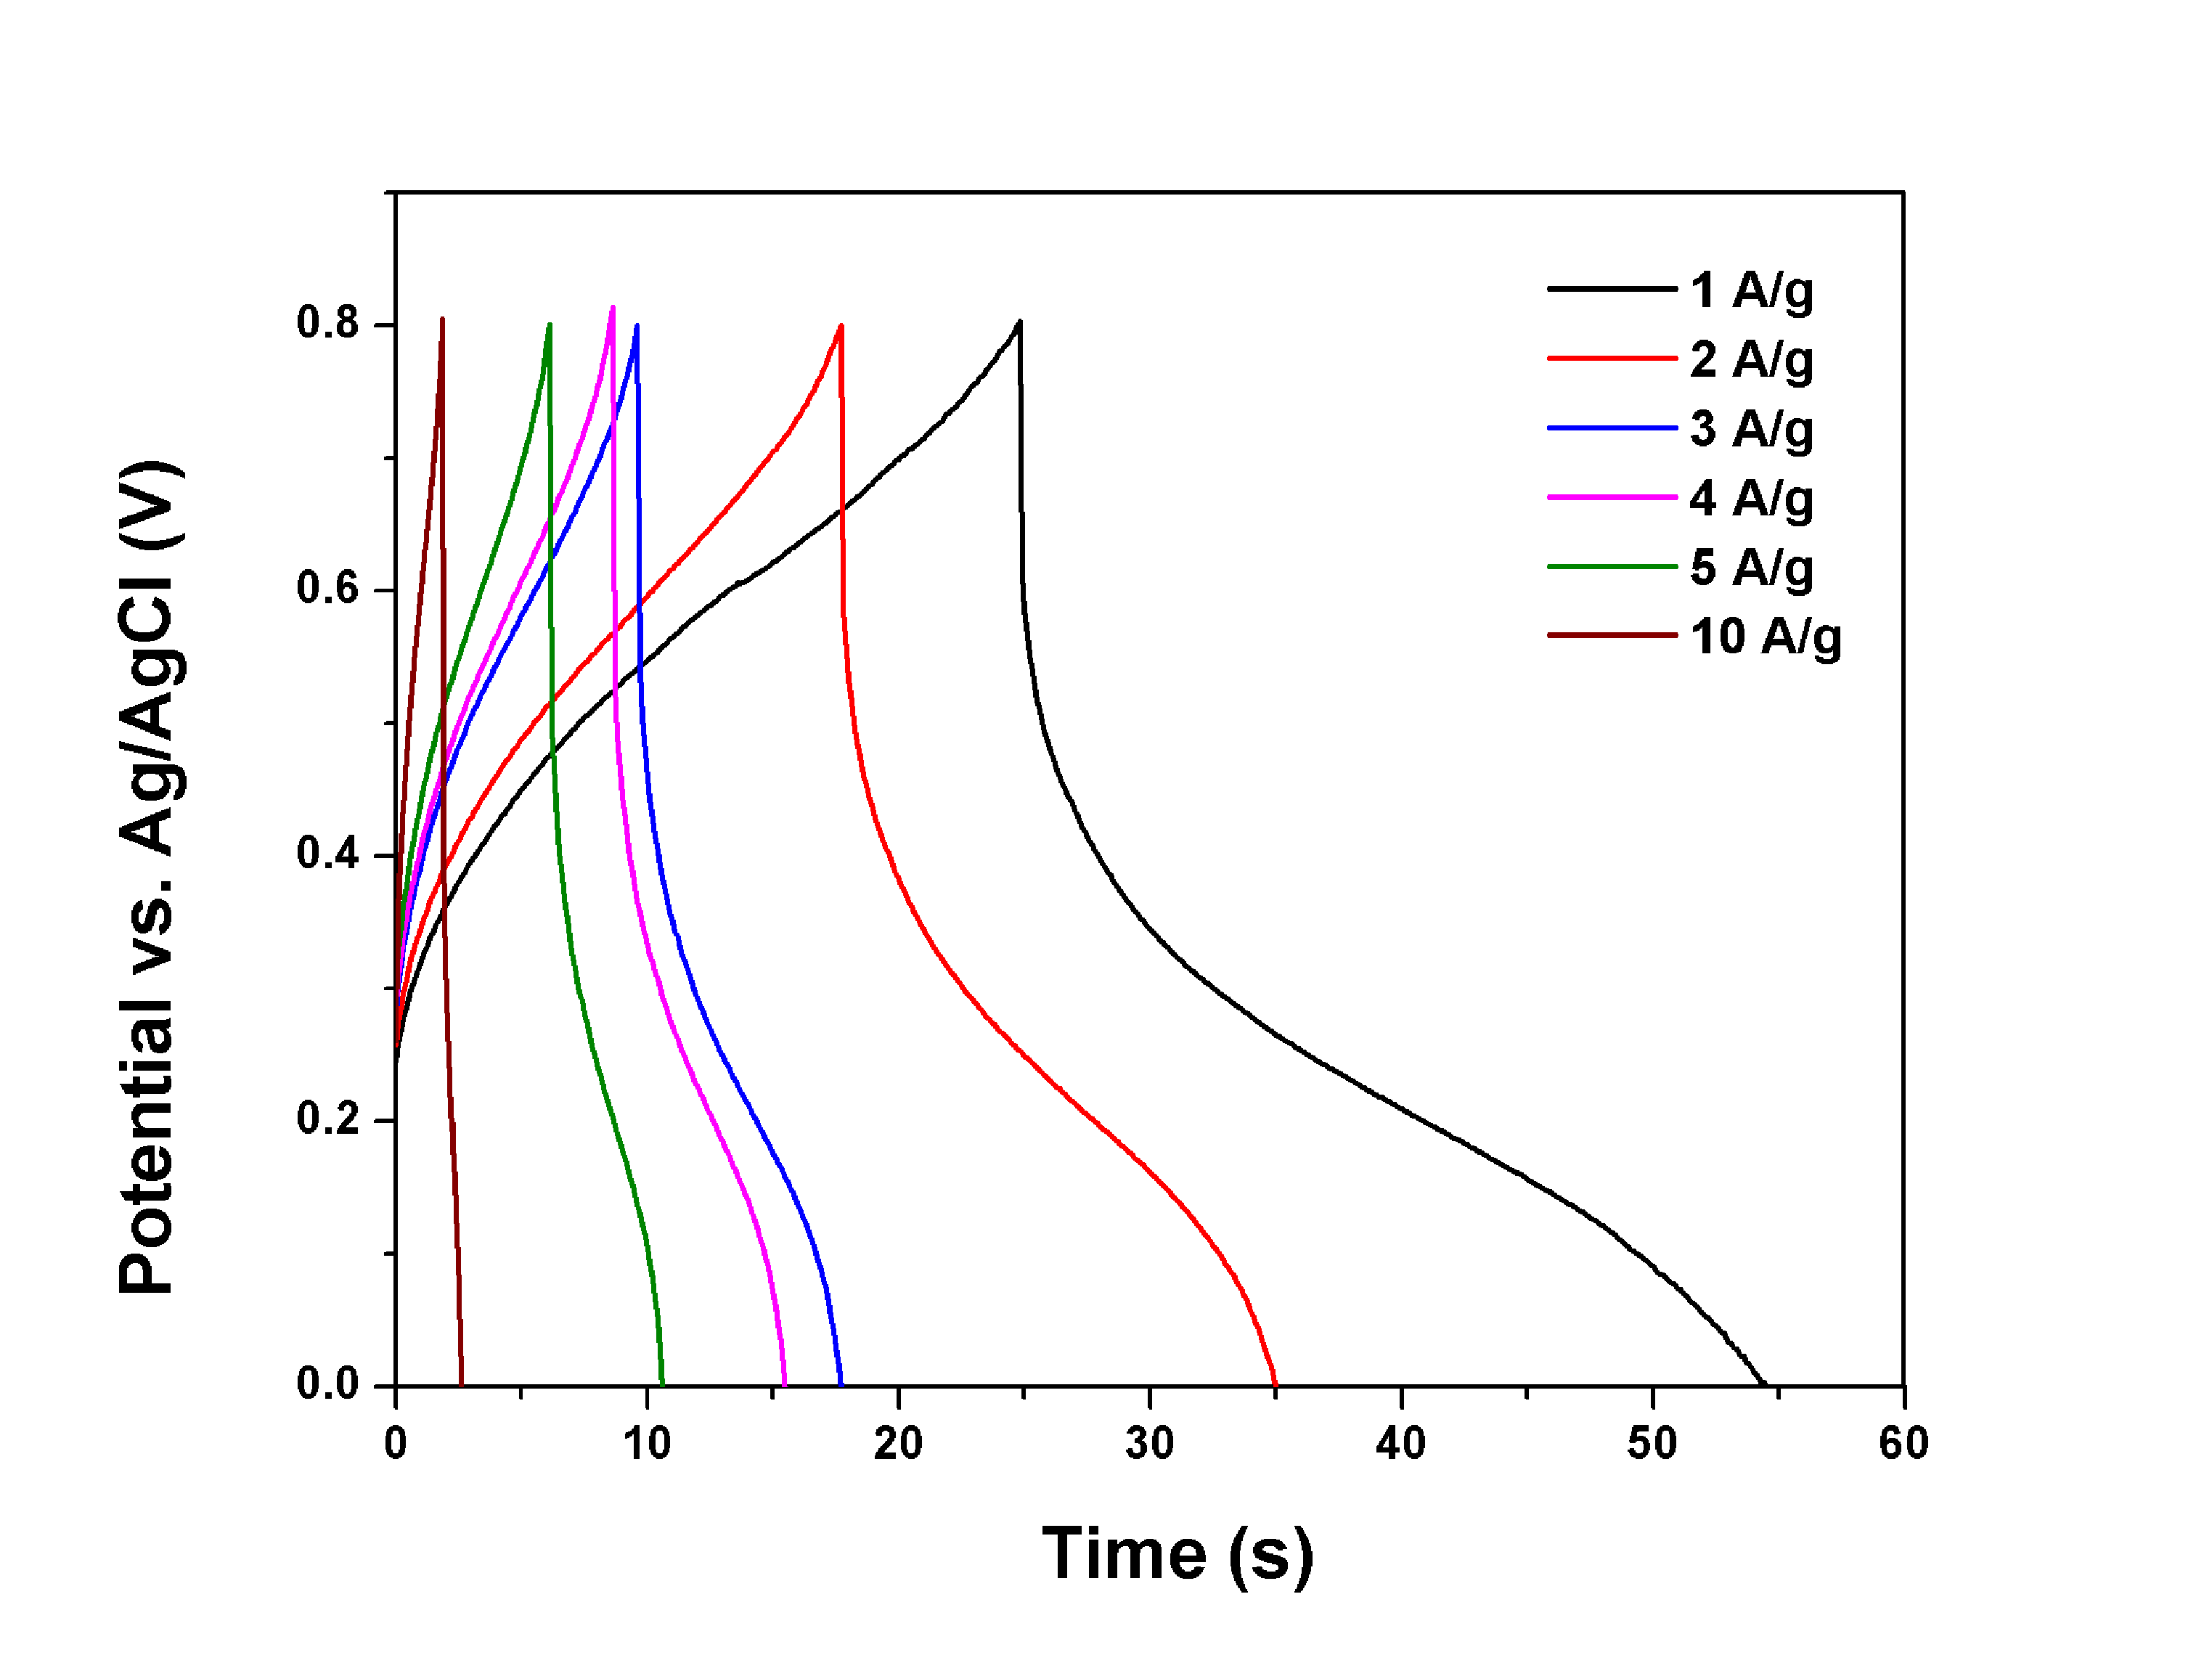


**Figure S5.** Galvanostatic charge-discharge profiles of P2 at different current rates.


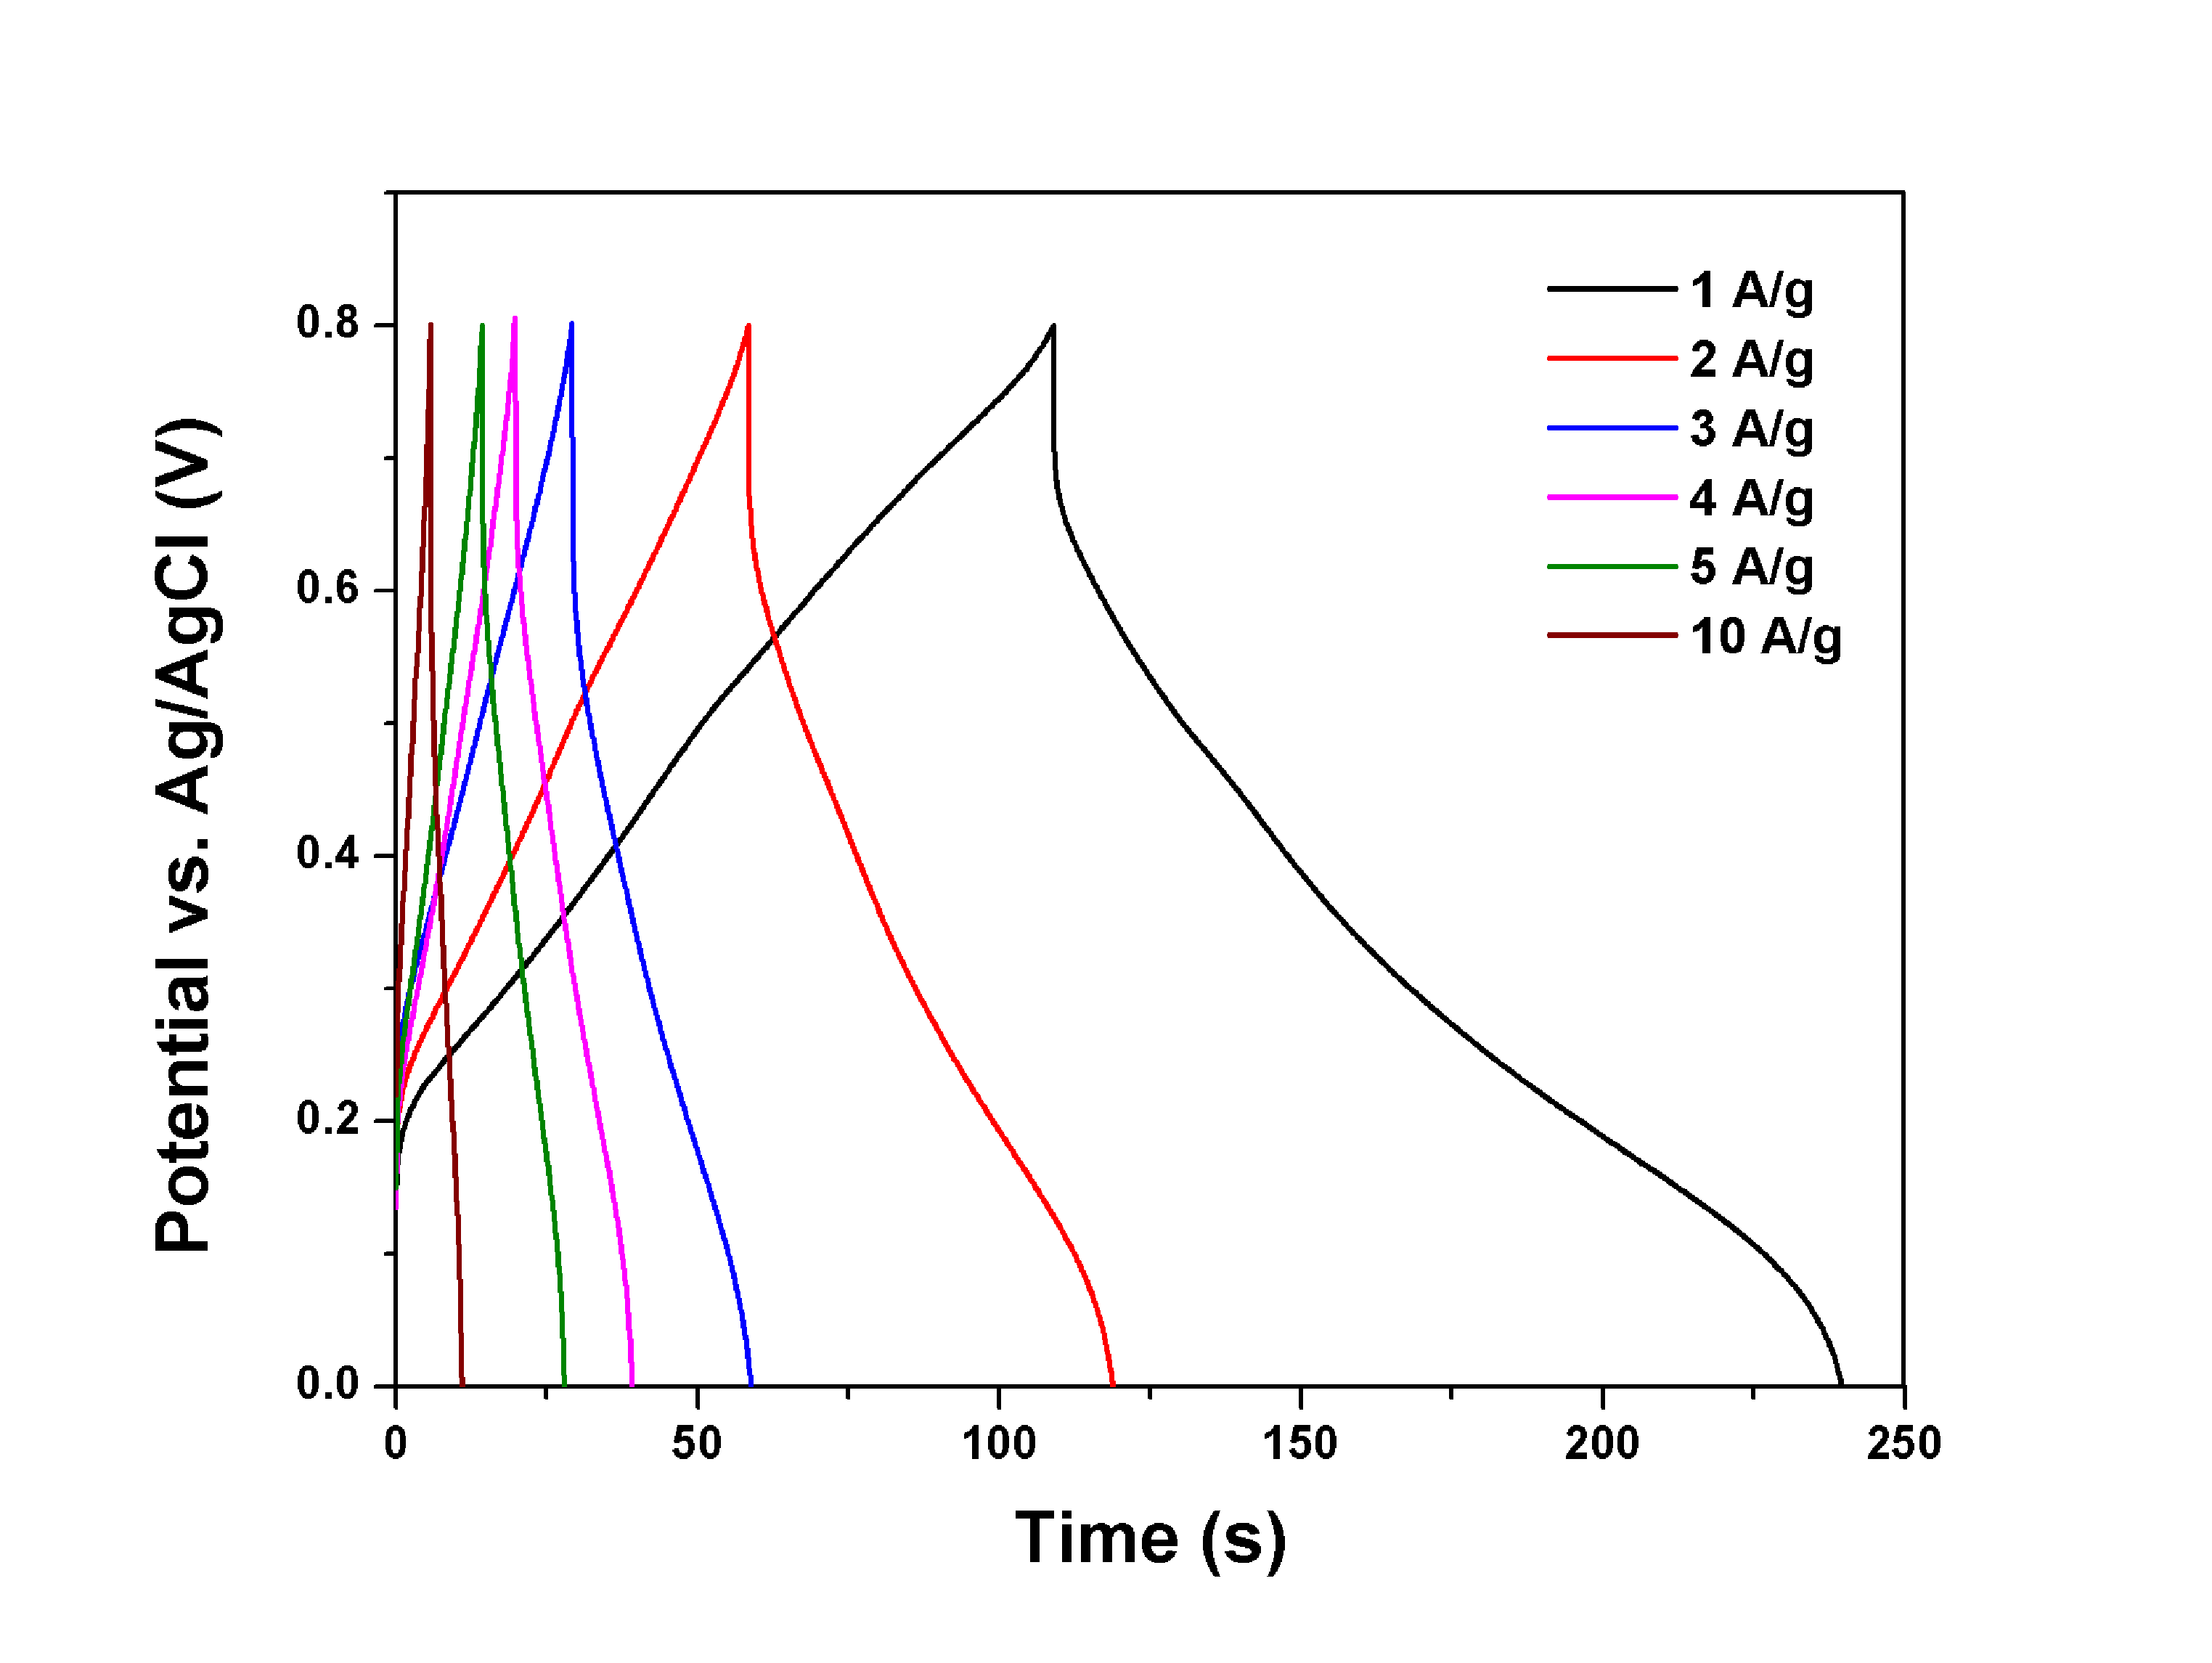


**Figure S6.** Galvanostatic charge-discharge profiles of P3 at different current rates.
